# Supplementary material for: Oral Treatment with the Extract of Euterpe oleracea Mart. Improves Motor Dysfunction and Reduces Brain Injury in Rats Subjected to Ischemic Stroke
Source: MDPI journal article supplement (doi:10.3390/nu15051207), 2023-02-28
Supplement: s1 [file s1]

### Supplementary 1

ST1 (Supplementary Table 1) – Neurological/motor deficit scores of animals submitted to middle cerebral artery occlusion (MCAO) and treated with clarified *Euterpe oleracea* (EO) extract. Data are presented as means  $\pm$  SD (n = 6-9 animals per group). \*  $p < 0.05$ : vs Sham and Sham+EO. #  $p < 0.05$ : vs MCAO. Different letters above the data points denote significant differences between days (column) ( $p < 0.05$ ).

| Days                 | Sham                       | Sham+EO                    | MCAO                         | MCAO+EO                        |
|----------------------|----------------------------|----------------------------|------------------------------|--------------------------------|
| 1 <sup>st</sup> Day  | 0.0 $\pm$ 0.0 <sup>a</sup> | 0.0 $\pm$ 0.0 <sup>a</sup> | 3.0 $\pm$ 0.0 <sup>*a</sup>  | 2.5 $\pm$ 0.53 <sup>*#a</sup>  |
| 2 <sup>nd</sup> Day  | 0.0 $\pm$ 0.0 <sup>a</sup> | 0.0 $\pm$ 0.0 <sup>a</sup> | 2.5 $\pm$ 0.54 <sup>*a</sup> | 2.5 $\pm$ 0.53 <sup>*a</sup>   |
| 3 <sup>rd</sup> Day  | 0.0 $\pm$ 0.0 <sup>a</sup> | 0.0 $\pm$ 0.0 <sup>a</sup> | 2.5 $\pm$ 0.54 <sup>*a</sup> | 2.5 $\pm$ 0.53 <sup>*a</sup>   |
| 4 <sup>th</sup> Day  | 0.0 $\pm$ 0.0 <sup>a</sup> | 0.0 $\pm$ 0.0 <sup>a</sup> | 2.3 $\pm$ 0.51 <sup>*b</sup> | 2.25 $\pm$ 0.46 <sup>*a</sup>  |
| 5 <sup>th</sup> Day  | 0.0 $\pm$ 0.0 <sup>a</sup> | 0.0 $\pm$ 0.0 <sup>a</sup> | 2.3 $\pm$ 0.51 <sup>*b</sup> | 2.25 $\pm$ 0.46 <sup>*a</sup>  |
| 6 <sup>th</sup> Day  | 0.0 $\pm$ 0.0 <sup>a</sup> | 0.0 $\pm$ 0.0 <sup>a</sup> | 2.3 $\pm$ 0.51 <sup>*b</sup> | 2.0 $\pm$ 0.0 <sup>*a</sup>    |
| 7 <sup>th</sup> Day  | 0.0 $\pm$ 0.0 <sup>a</sup> | 0.0 $\pm$ 0.0 <sup>a</sup> | 2.3 $\pm$ 0.51 <sup>*b</sup> | 2.0 $\pm$ 0.0 <sup>*a</sup>    |
| 8 Day                | 0.0 $\pm$ 0.0 <sup>a</sup> | 0.0 $\pm$ 0.0 <sup>a</sup> | 2.3 $\pm$ 0.51 <sup>*b</sup> | 2.0 $\pm$ 0.0 <sup>*a</sup>    |
| 9 <sup>th</sup> Day  | 0.0 $\pm$ 0.0 <sup>a</sup> | 0.0 $\pm$ 0.0 <sup>a</sup> | 2.3 $\pm$ 0.51 <sup>*b</sup> | 1.87 $\pm$ 0.35 <sup>*#b</sup> |
| 10 <sup>th</sup> Day | 0.0 $\pm$ 0.0 <sup>a</sup> | 0.0 $\pm$ 0.0 <sup>a</sup> | 2.3 $\pm$ 0.51 <sup>*b</sup> | 1.87 $\pm$ 0.35 <sup>*#b</sup> |
| 11 <sup>th</sup> Day | 0.0 $\pm$ 0.0 <sup>a</sup> | 0.0 $\pm$ 0.0 <sup>a</sup> | 2.3 $\pm$ 0.51 <sup>*b</sup> | 1.75 $\pm$ 0.46 <sup>*#b</sup> |
| 12 <sup>th</sup> Day | 0.0 $\pm$ 0.0 <sup>a</sup> | 0.0 $\pm$ 0.0 <sup>a</sup> | 2.3 $\pm$ 0.51 <sup>*b</sup> | 1.75 $\pm$ 0.46 <sup>*#b</sup> |
| 13 <sup>th</sup> Day | 0.0 $\pm$ 0.0 <sup>a</sup> | 0.0 $\pm$ 0.0 <sup>a</sup> | 2.3 $\pm$ 0.51 <sup>*b</sup> | 1.62 $\pm$ 0.51 <sup>*#b</sup> |
| 14 <sup>th</sup> Day | 0.0 $\pm$ 0.0 <sup>a</sup> | 0.0 $\pm$ 0.0 <sup>a</sup> | 2.3 $\pm$ 0.51 <sup>*b</sup> | 1.62 $\pm$ 0.51 <sup>*#b</sup> |

ST2 (Supplementary Table 2) –Neuronal death attenuated by clarified *Euterpe oleracea* (EO) extract after middle cerebral artery occlusion (MCAO). Data are presented as means  $\pm$  SD (n = 6 animals per group). \*  $p < 0.05$ : vs Sham and Sham+EO. #  $p < 0.05$ : vs MCAO.

| Region       | Sham              | Sham+EO           | MCAO               | MCAO+EO             |
|--------------|-------------------|-------------------|--------------------|---------------------|
| Layer I      | 2.59 $\pm$ 2.74   | 2.90 $\pm$ 2.33   | 0.0 $\pm$ 0.0      | 1.85 $\pm$ 1.53     |
| Layer II/III | 52.06 $\pm$ 8.08  | 48.18 $\pm$ 15.06 | 0.46 $\pm$ 0.93*   | 23.46 $\pm$ 13.61*# |
| Layer IV     | 70.53 $\pm$ 9.55  | 64.00 $\pm$ 16.44 | 1.53 $\pm$ 2.01*   | 53.23 $\pm$ 33.90#  |
| Layer V      | 41.78 $\pm$ 10.95 | 41.88 $\pm$ 4.26  | 6.06 $\pm$ 7.60*   | 37.79 $\pm$ 19.13#  |
| Layer VI     | 68.78 $\pm$ 12.84 | 58.50 $\pm$ 7.36  | 22.91 $\pm$ 11.98* | 50.32 $\pm$ 15.72#  |
| Striatum     | 55.75 $\pm$ 12.74 | 58.50 $\pm$ 14.00 | 13.67 $\pm$ 12.38* | 45.06 $\pm$ 7.07#   |
| Penumbra     | -                 | -                 | 45.42 $\pm$ 5.32   | 62.59 $\pm$ 14.31#  |
